# Supplementary material for: ZnO nanopinecone arrays with enhanced photocatalytic performance in sunlight
Source: Royal Society of Chemistry journal article supplement (doi:10.1039/c4ra02044h), 2014-01-01
Supplement: c4ra02044h1.pdf [file c4ra02044h1.pdf]

## Supporting Information:

### ZnO Nanopinecone Arrays with Enhanced Photocatalytic Performance in Sunlight

*Yu-Cheng Chang\**

Department of Materials Science and Engineering, Feng Chia University, Taichung,  
40724, Taiwan

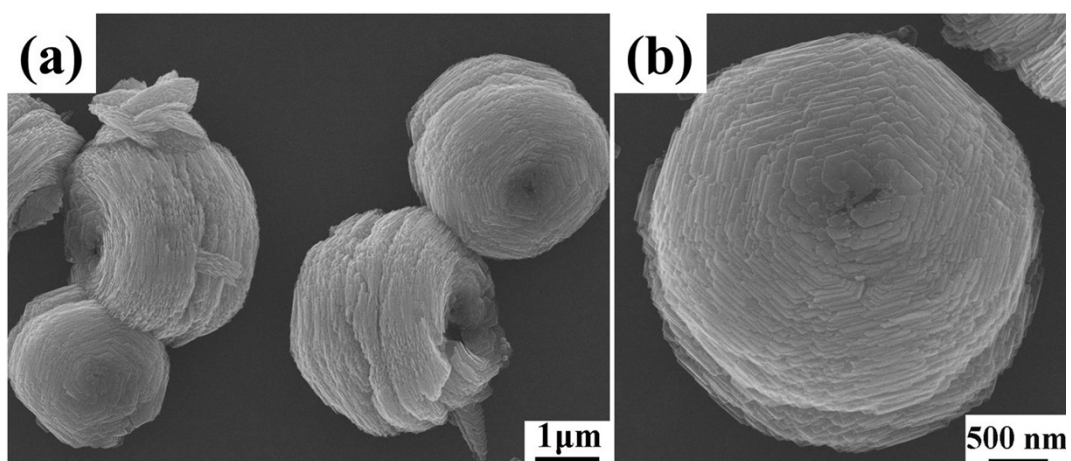

**Figure S1.** (a) Low and (b) high magnification SEM images of ball-like ZnO nanoplates grown on Si wafer with ZnO seeds layer.

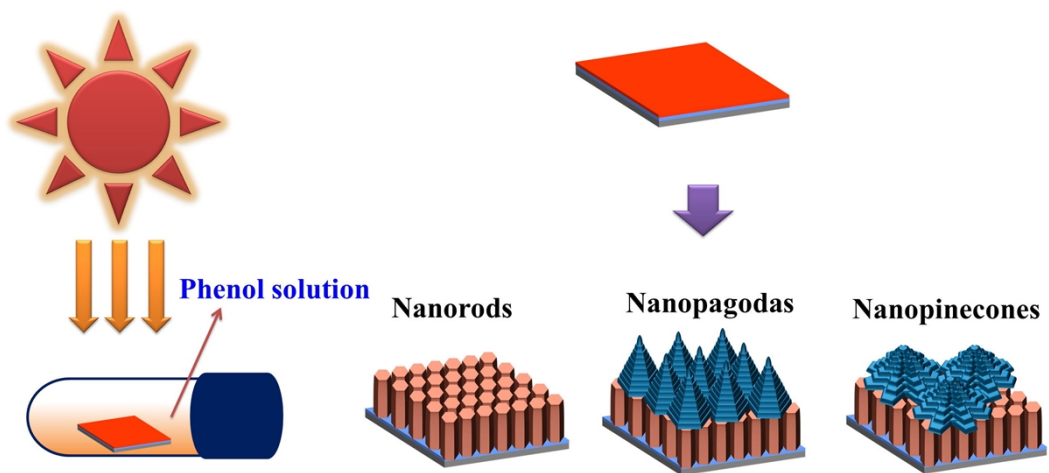

**Figure S2.** Schematic diagram illustrates the processes and substrates to catalyze the degradation of phenol by sunlight.
